# Supplementary material for: Do Sustainable Palliative Single Fraction Radiotherapy Practices Proliferate or Perish 2 Years after a Knowledge Translation Campaign?
Source: MDPI journal article supplement (doi:10.3390/curroncol29070404), 2022-07-19
Supplement: s1 [file s1]

**Table S1.** Multivariable Logistic Regression Analysis (Model 2) for Receipt of MFRT merging the 2017 and 2018 datasets and includes a treatment year variable (2017 versus 2018) (GU: Genitourinary; ECOG: Eastern Cooperative Oncology Group).

| Variable                                  |                  | Multivariable Odds Ratio<br>(95%CI) | p-Value |
|-------------------------------------------|------------------|-------------------------------------|---------|
| Age (years)                               | 5 to ≤ 58        | Ref                                 | Ref     |
|                                           | 59 to ≤ 68       | 0.85 (0.63 to 1.14)                 | 0.273   |
|                                           | 69 to ≤ 76       | 0.82 (0.59 to 1.14)                 | 0.246   |
|                                           | ≥ 77             | 0.56 (0.40 to 0.79)                 | 0.001   |
| Sex                                       | Female           | Ref                                 | Ref     |
|                                           | Male             | 1.23 (0.93 to 1.63)                 | 0.142   |
| ECOG Performance Status                   | 0-1              | Ref                                 | Ref     |
|                                           | 2                | 0.70 (0.54 to 0.89)                 | 0.004   |
|                                           | 3-4              | 0.56 (0.42 to 0.75)                 | <0.0001 |
| Charlson Score                            | 0                | Ref                                 | Ref     |
|                                           | 1                | 0.84 (0.64 to 1.10)                 | 0.203   |
|                                           | 2                | 0.77 (0.55 to 1.07)                 | 0.117   |
|                                           | ≥3               | 0.53 (0.35 to 0.79)                 | 0.002   |
| Tumour Type                               | Prostate         | Ref                                 | Ref     |
|                                           | Breast           | 1.87 (1.19 to 2.96)                 | 0.007   |
|                                           | Lung             | 1.76 (1.22 to 2.55)                 | 0.003   |
|                                           | Hematological    | 3.13 (2.00 to 4.90)                 | <0.0001 |
|                                           | Non-Prostate GU  | 2.62 (1.69 to 4.06)                 | <0.0001 |
|                                           | Gastrointestinal | 1.86 (1.18 to 2.95)                 | 0.008   |
|                                           | Other            | 1.99 (1.27 to 3.13)                 | 0.003   |
| Treatment Site                            | Skull/Spine      | Ref                                 | Ref     |
|                                           | Upper Extremity  | 0.41 (0.26 to 0.66)                 | <0.0001 |
|                                           | Thorax           | 0.47 (0.31 to 0.73)                 | 0.001   |
|                                           | Pelvis           | 0.73 (0.56 to 0.94)                 | 0.014   |
|                                           | Lower Extremity  | 0.80 (0.53 to 1.22)                 | 0.301   |
| Fracture                                  | No               | Ref                                 | Ref     |
|                                           | Yes              | 1.12 (0.87 to 1.44)                 | 0.399   |
| Soft Tissue Extension                     | No               | Ref                                 | Ref     |
|                                           | Yes              | 3.14 (2.43 to 4.05)                 | <0.0001 |
| Spinal Cord Compression                   | No               | Ref                                 | Ref     |
|                                           | Yes              | 2.63 (2.34 to 5.63)                 | <0.0001 |
| Cauda Equina Compression                  | No               | Ref                                 | Ref     |
|                                           | Yes              | 3.29 (1.71 to 6.33)                 | <0.0001 |
| Retreatment                               | No               | Ref                                 | Ref     |
|                                           | Yes              | 0.50 (0.35 to 0.71)                 | <0.0001 |
| Treatment Location                        | Winnipeg         | Ref                                 | Ref     |
|                                           | Brandon          | 1.63 (1.13 to 2.34)                 | 0.008   |
| Radiation Oncologist Years<br>in Practice | ≤ 7              | Ref                                 | Ref     |
|                                           | 8 to 17          | 0.90 (0.65 to 1.25)                 | 0.540   |
|                                           | ≥18              | 0.58 (0.42 to 0.82)                 | 0.002   |
| Treatment Year                            | 2017             | Ref                                 | Ref     |
|                                           | 2018             | 0.70 (0.56 to 0.87)                 | 0.001   |

**Table S2.** Univariable Logistic Regression Analysis for Receipt of MFRT in 2018 (GU: Genitourinary; ECOG: Eastern Cooperative Oncology Group).

| Variable                               |                  | Univariable Odds Ratio (95% CI) | p-Value |
|----------------------------------------|------------------|---------------------------------|---------|
| Age (years)                            | 5 to ≤ 57        | Ref                             | Ref     |
|                                        | 58 to ≤ 66       | 0.84 (0.58 to 1.21)             | 0.339   |
|                                        | 67 to ≤ 75       | 0.76 (0.53 to 1.09)             | 0.131   |
|                                        | ≥ 76             | 0.52 (0.36 to 0.76)             | 0.001   |
| Sex                                    | Female           | Ref                             | Ref     |
|                                        | Male             | 0.83 (0.64 to 1.07)             | 0.155   |
| ECOG Performance Status                | 0-1              | Ref                             | Ref     |
|                                        | 2                | 0.76 (0.55 to 1.06)             | 0.103   |
|                                        | 3-4              | 0.95 (0.69 to 1.32)             | 0.779   |
| Charlson Score                         | 0                | Ref                             | Ref     |
|                                        | 1                | 0.83 (0.60 to 1.15)             | 0.255   |
|                                        | 2                | 0.85 (0.58 to 1.25)             | 0.408   |
|                                        | ≥3               | 0.52 (0.33 to 0.81)             | 0.004   |
| Tumour Type                            | Prostate         | Ref                             | Ref     |
|                                        | Breast           | 2.21 (1.45 to 3.38)             | <0.0001 |
|                                        | Lung             | 2.07 (1.40 to 3.07)             | <0.0001 |
|                                        | Hematological    | 3.71 (2.20 to 6.25)             | <0.0001 |
|                                        | Non-Prostate GU  | 4.44 (2.66 to 7.41)             | <0.0001 |
|                                        | Gastrointestinal | 2.63 (1.53 to 4.53)             | <0.0001 |
|                                        | Other            | 2.23 (1.32 to 3.74)             | 0.003   |
| Treatment Site                         | Skull/Spine      | Ref                             | Ref     |
|                                        | Upper Extremity  | 0.23 (0.13 to 0.40)             | <0.0001 |
|                                        | Thorax           | 0.45 (0.26 to 0.79)             | 0.005   |
|                                        | Pelvis           | 0.46 (0.34 to 0.62)             | <0.0001 |
|                                        | Lower Extremity  | 0.46 (0.26 to 0.78)             | 0.004   |
| Complicated Bone Metastasis            | Uncomplicated    | Ref                             | Ref     |
|                                        | Complicated      | 3.20 (2.43 to 4.22)             | <0.0001 |
| Fracture                               | No               | Ref                             | Ref     |
|                                        | Yes              | 2.21 (1.66 to 2.95)             | <0.0001 |
| Soft Tissue Extension                  | No               | Ref                             | Ref     |
|                                        | Yes              | 4.30 (3.26 to 5.68)             | <0.0001 |
| Spinal Cord Compression                | No               | Ref                             | Ref     |
|                                        | Yes              | 5.75 (3.47 to 9.51)             | <0.0001 |
| Cauda Equina Compression               | No               | Ref                             | Ref     |
|                                        | Yes              | 9.17 (3.48 to 24.18)            | 0.121   |
| Retreatment                            | No               | Ref                             | Ref     |
|                                        | Yes              | 0.75 (0.50 to 1.11)             | 0.153   |
| Post-Operative Radiotherapy            | No               | Ref                             | Ref     |
|                                        | Yes              | 2.73 (1.52 to 4.87)             | 0.001   |
| Treatment Location                     | Winnipeg         | Ref                             | Ref     |
|                                        | Brandon          | 1.58 (1.11 to 2.26)             | 0.012   |
| Radiation Oncologist Years in Practice | ≤ 6              | Ref                             | Ref     |
|                                        | 7 to 16          | 0.93 (0.68 to 1.28)             | 0.657   |
|                                        | ≥17              | 0.38 (0.27 to 0.54)             | <0.0001 |
